# Supplementary material
Source: PubMed Central journal article supplement (PMC5546101)
Supplement: NIHMS887331-supplement-Supplemental.pdf [file NIHMS887331-supplement-Supplemental.pdf]

# Supplementary Information

## A human islet cell-culture system for high-throughput screening

*Deepika Walpita<sup>1</sup>, Thomas Hasaka<sup>†2</sup>, James Spoonamore<sup>†2</sup>, Amedeo Vetere<sup>1</sup>, Karen K. Takane<sup>3</sup>, Dina Fomina-Yadlin<sup>1,4</sup>, Nathalie Fiaschi-Taesch<sup>3</sup>, Alykhan Shamji<sup>1</sup>, Paul A. Clemons<sup>1</sup>, Andrew F. Stewart<sup>3</sup>, Stuart L. Schreiber<sup>1,4,5,6</sup>, and Bridget K. Wagner<sup>\*1</sup>*

Affiliations:

<sup>1</sup> Chemical Biology Program, <sup>2</sup> Chemical Biology Platform, Broad Institute, 7 Cambridge Center, Cambridge, MA 02142

<sup>3</sup> Department of Endocrinology, University of Pittsburgh Medical School, Pittsburgh, PA 15213

<sup>4</sup> Department of Molecular and Cellular Biology, <sup>5</sup> Department of Chemistry and Chemical Biology, Harvard University, Cambridge, MA 02138

<sup>6</sup> Howard Hughes Medical Institute, Broad Institute, 7 Cambridge Center, Cambridge, MA 02142

\* Corresponding author email: [bwagner@broadinstitute.org](mailto:bwagner@broadinstitute.org).

† These authors contributed equally to this work.

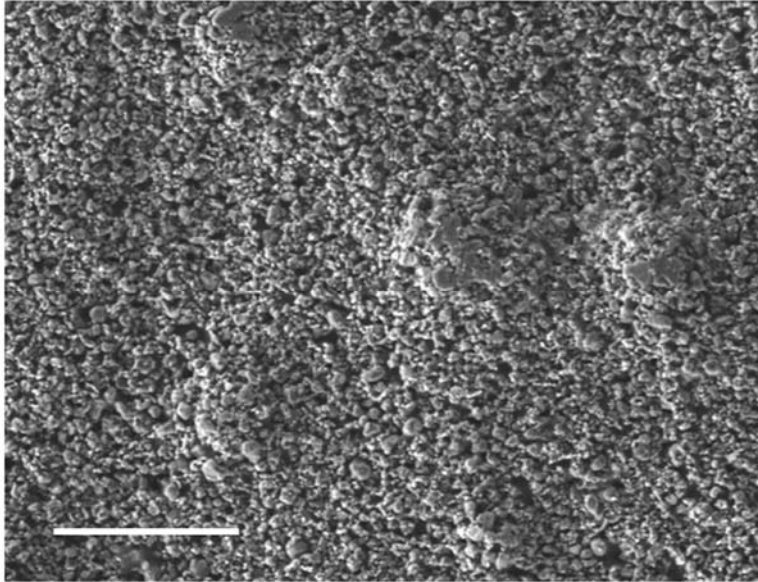

**Supplementary Figure S1.** Electron micrograph of the surface of a 96-well plate containing extracellular matrix from HTB-9 cells grown and denuded. Scale bar = 50 $\mu$ m.

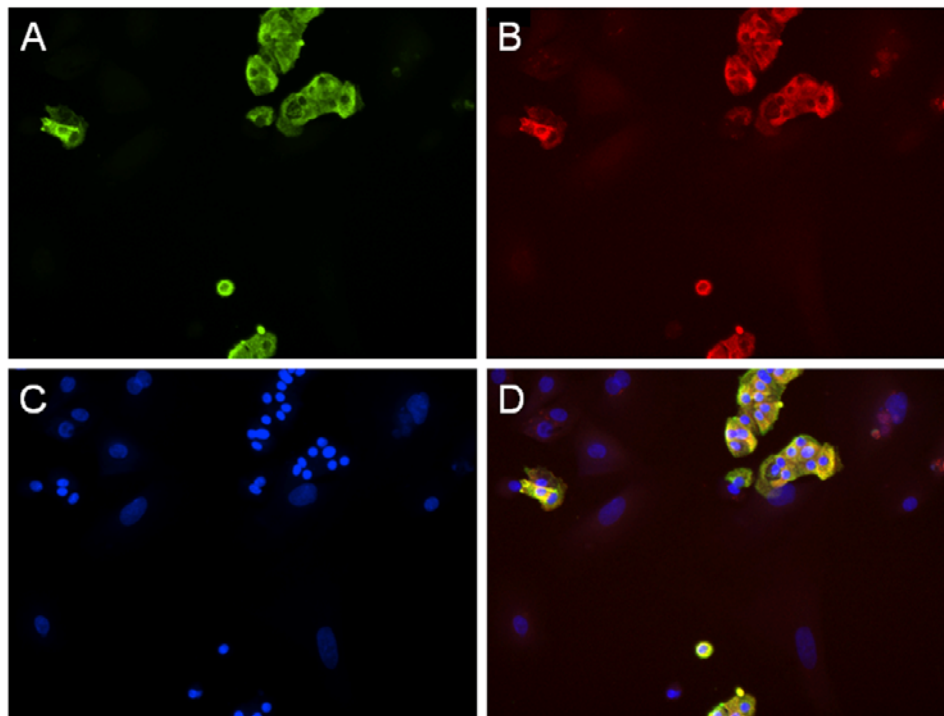

**Supplementary Figure S2.** Immunofluorescence of dissociated islet cells cultured on ECM. Evaluation of overlap between C-peptide (a cleavage product of proinsulin) and insulin stains. Cells were stained for **(A)** C-peptide (green), **(B)** insulin (red), and **(C)** nuclei were stained with DAPI (blue). **(D)** Image overlay.

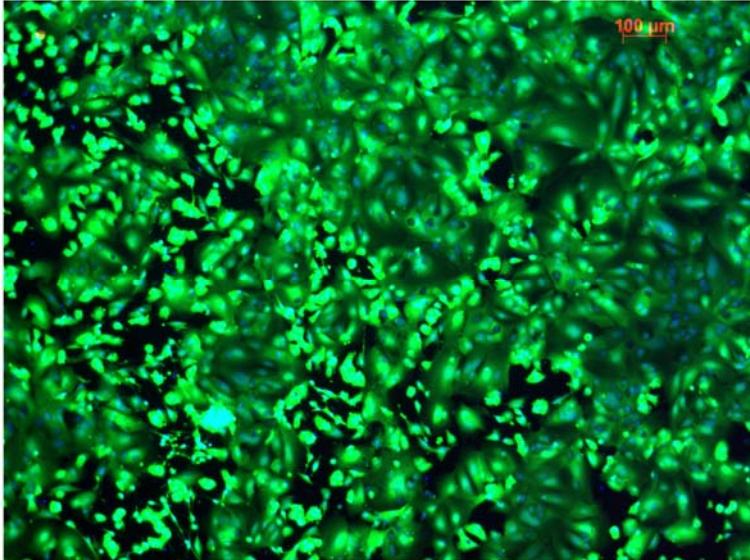

**Supplementary Figure S3.** Dissociated islet cells were plated in a 96-well plate, and viability assessed by the fluorescent vital stain calcein-AM.

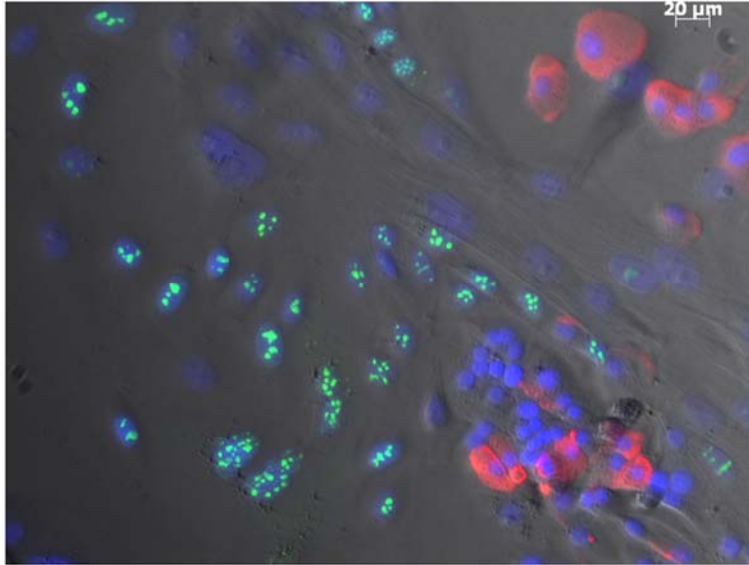

**Supplementary Figure S4.** Proliferating cells within dissociated islets appear fibroblastic in nature. Overlay of bright-field, nuclei (blue), Ki67 for proliferation (green), and C-peptide for beta cells (red).

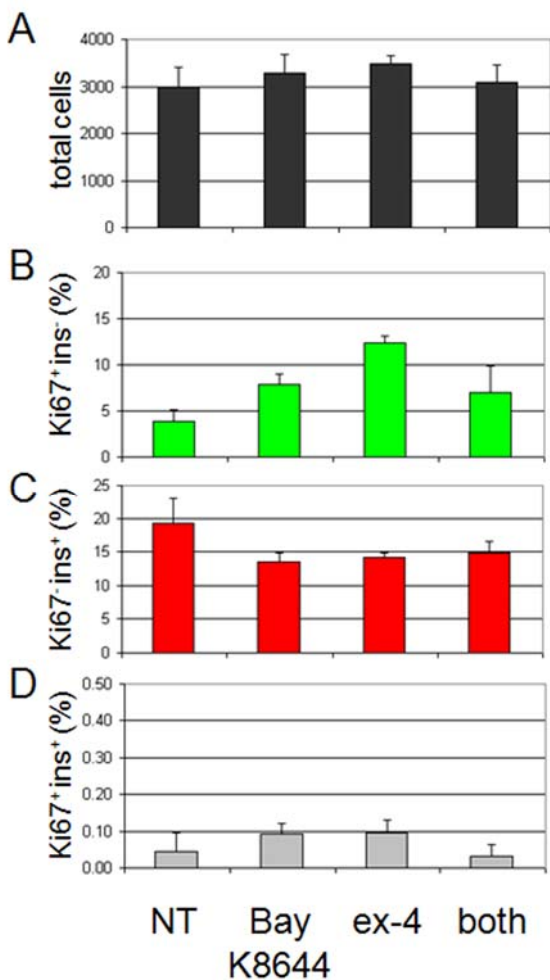

**Supplementary Figure S5.** Dissociated islets were treated for three days with DMSO (NT), 10 $\mu$ M Bay K8644, 100nM exendin-4 (ex-4), or both. Cells were fixed and stained as described in the text, and populations quantified: (A) total cells, (B) percentage of proliferating non-beta cells, (C) percentage of quiescent beta cells, and (D) percentage of proliferating beta cells.

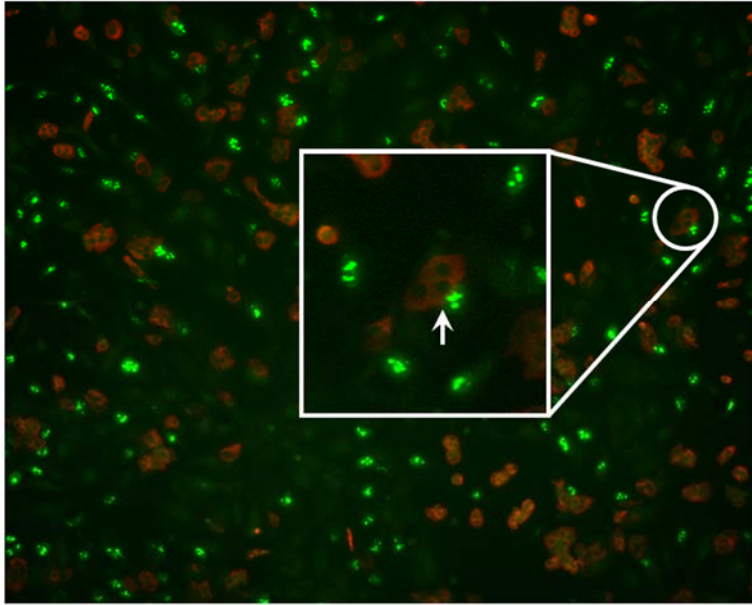

**Supplementary Figure S6.** Untreated dissociated islet cells were stained for Ki67 (green) and C-peptide (red). Inset shows single cells falsely called positive during automated image analysis.

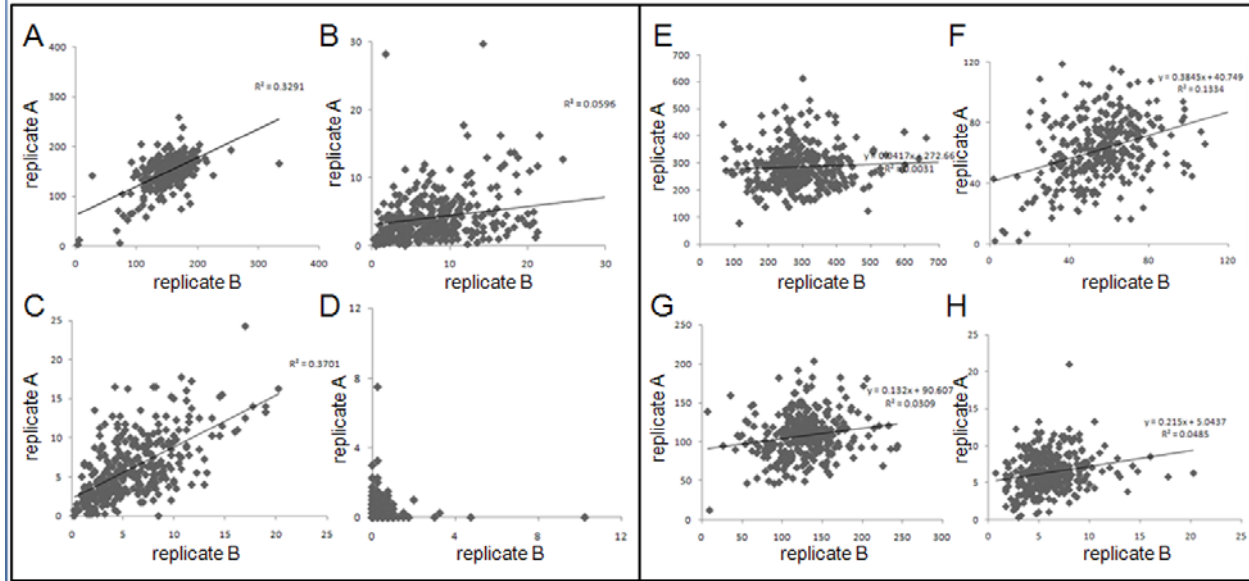

**Supplementary Figure S7.** Analysis of screening performance reproducibility with donors 2 and 3 (see Supplementary Table S1). The two replicates are plotted against each other examining **(A,E)** total cells, **(B,F)** proliferating C-peptide-negative cells, **(C,G)** quiescent C-peptide-positive beta cells, and **(D,H)** proliferating beta cells. The correlations of each dataset to a linear fit are shown. Note that the scales for each donor are very different, due to donor variability and variability in islet isolation procedures.



**Supplementary Table S1.** Donor information for islets used in assay development and screening. <sup>a</sup> Samples used for pilot screening. <sup>b</sup> Samples used for replicate analysis.

| <b>Donor</b>   | <b>Age</b> | <b>Race</b> | <b>Gender</b> | <b>BMI</b> | <b>Purity</b> | <b>Note</b> |
|----------------|------------|-------------|---------------|------------|---------------|-------------|
| 1 <sup>a</sup> | 12         | --          | --            | 34.0       | 95%           |             |
| 2 <sup>a</sup> | 47         | W           | F             | 27.6       | 85%           |             |
| 3 <sup>a</sup> | 36         | --          | F             | 37.4       | 95%           |             |
| 4 <sup>b</sup> | 58         | B           | M             | 66.6       | 75%           | T2D         |
| 5              | 49         | W           | M             | 30.5       | 75%           | T1D         |
| 6              | 52         | W           | F             | 38.8       | 85%           |             |
| 7 <sup>b</sup> | 42         | --          | --            | 22.0       | 70%           |             |
| 8 <sup>b</sup> | 38         | W           | F             | 31.6       | 90%           |             |
| 9              | 47         | W           | M             | 23.0       | 85%           |             |
| 10             | 30         | W           | M             | 30.4       | 45%           |             |
| 11             | 55         | W           | F             | 23.3       | 85%           |             |
| 12             | 52         | W           | F             | 29.1       | 75%           |             |
| 13             | 40         | W           | F             | 24.4       | 85%           |             |
| 14             | 39         | W           | M             | 26.9       | 90%           |             |
| 15             | 32         | W           | M             | 27.2       | 85%           |             |
| 16             | 31         | W           | M             | 30.7       | 85%           |             |
| 17             | 33         | W           | F             | 26.0       | 80%           |             |
| 18             | 53         | W           | M             | 31.0       | 30%           |             |

**Supplementary Table S2.** Performance analysis of 256 DMSO-containing wells during pilot screening. Nine parameters were calculated by image analysis (MetaXpress, Molecular Devices).

| Parameter                  | Average $\pm$ SD |              |              | CV     |        |        |
|----------------------------|------------------|--------------|--------------|--------|--------|--------|
|                            | Donor1           | Donor2       | Donor3       | Donor1 | Donor2 | Donor3 |
| Total cells                | 412 $\pm$ 124    | 353 $\pm$ 60 | 264 $\pm$ 87 | 30%    | 17%    | 33%    |
| Positive Ki67              | 39 $\pm$ 27      | 27 $\pm$ 10  | 78 $\pm$ 39  | 70%    | 39%    | 51%    |
| % Positive Ki67            | 9 $\pm$ 4        | 8 $\pm$ 3    | 29 $\pm$ 7   | 45%    | 35%    | 25%    |
| Positive C-peptide         | 168 $\pm$ 36     | 121 $\pm$ 27 | 70 $\pm$ 21  | 21%    | 22%    | 30%    |
| % Positive C-peptide       | 42 $\pm$ 8       | 34 $\pm$ 3   | 27 $\pm$ 6   | 18%    | 9%     | 23%    |
| Positive scoring profiles: |                  |              |              |        |        |        |
| Hoechst only               | 208 $\pm$ 91     | 208 $\pm$ 32 | 123 $\pm$ 43 | 44%    | 16%    | 35%    |
| Hoechst & Ki67             | 36 $\pm$ 26      | 24 $\pm$ 10  | 71 $\pm$ 37  | 71%    | 40%    | 52%    |
| Hoechst & C-peptide        | 165 $\pm$ 35     | 118 $\pm$ 26 | 62 $\pm$ 19  | 21%    | 22%    | 31%    |
| All three stains           | 3 $\pm$ 2        | 2 $\pm$ 1    | 7 $\pm$ 4    | 67%    | 51%    | 53%    |
